# Supplementary material for: A Phase I/Ib Trial of the VEGFR-Sparing Multikinase RET Inhibitor RXDX-105
Source: Oxford University Press journal article supplement (doi:10.1158/2159-8290.cd-18-0839), 2018-11-28
Supplement: 21598290cd180839-sup-205647_2_supp_5170347_pbcddy.docx [file 21598290cd180839-sup-205647_2_supp_5170347_pbcddy.docx]

**SUPPLEMENTARY MATERIAL**

**Figure S1: Consort diagram.** The patient distribution across the phase 1 (dose escalation) and phase 1b (basket cohorts) is shown, specifically detailing the accrual of patients with cancers harboring *RET* alterations, as was the focus of this study in the phase 1b portion.


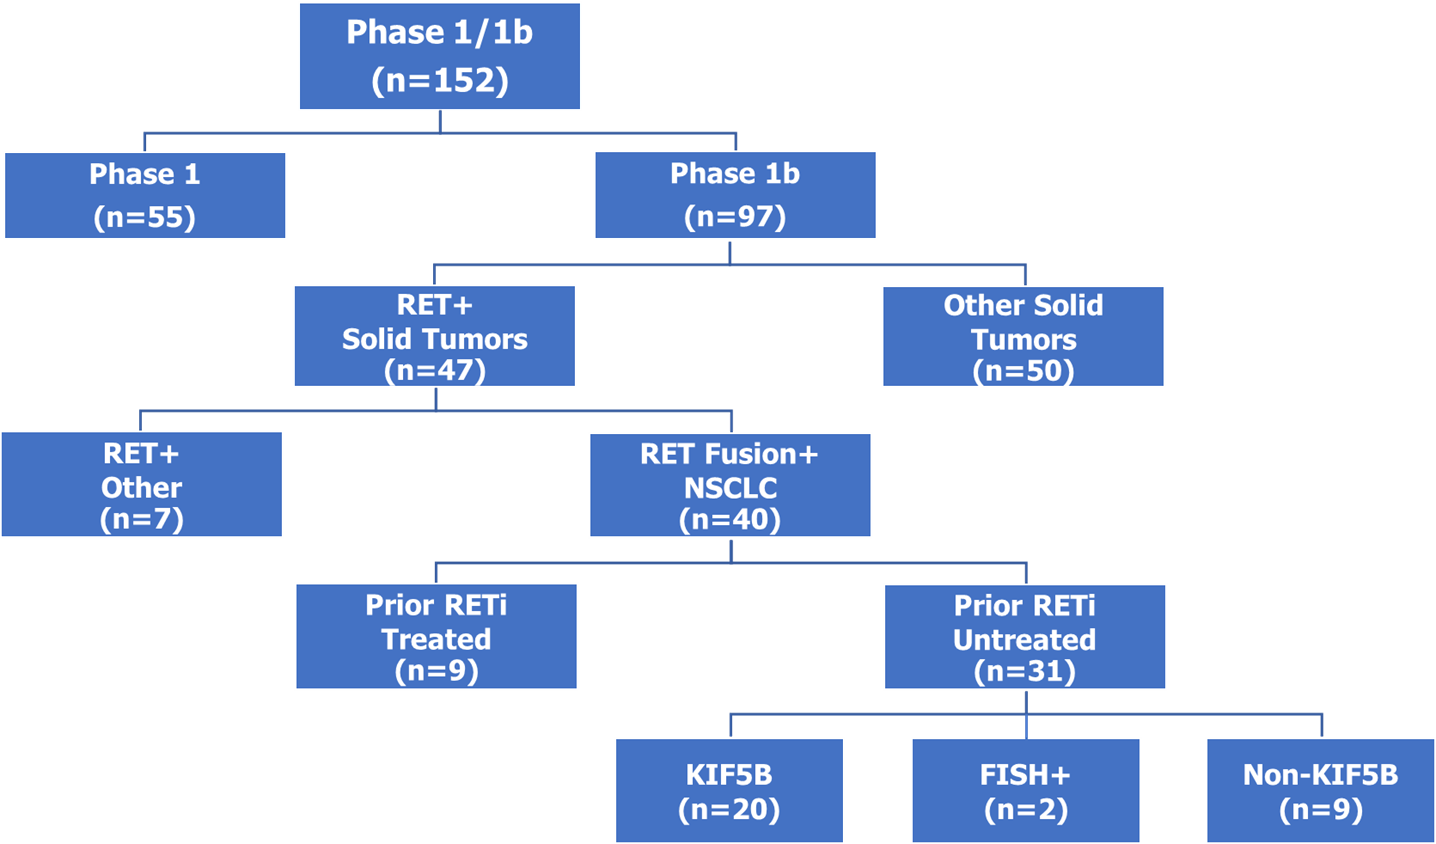


**Figure S2: Hypersensitivity reaction to RXDX-105.** A full body rash, facial swelling, and mucosal involvement with select features of DRESS syndrome occurred 12 days after initiation of RXDX-105. This unfortunately progressed to multisystem involvement and death from respiratory failure. The patient had prior exposure to immunotherapy, similar to two other patients with hypersensitivity reactions to RXDX-105 that did not result in death.

**
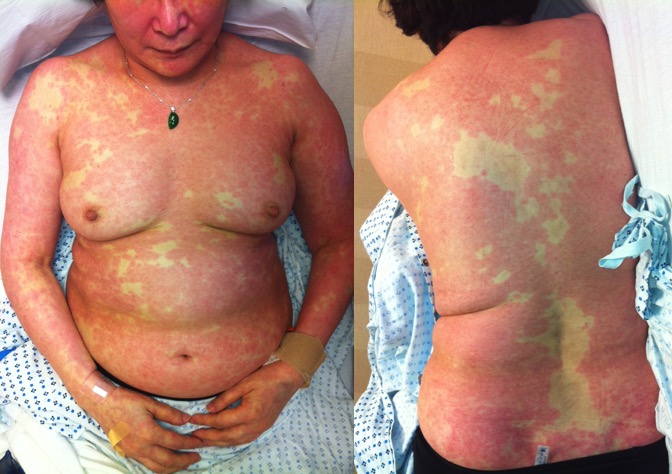
**

**Figure S3. Phase 1b basket trial cohorts.** Patients with non-V600E *BRAF* mutations were later accommodated in the non-squamous non-small cell lung cancer (NSCLC) arm as the intent of the original *BRAF* mutation-positive cohorts was to accrue only V600E-altered cancers.


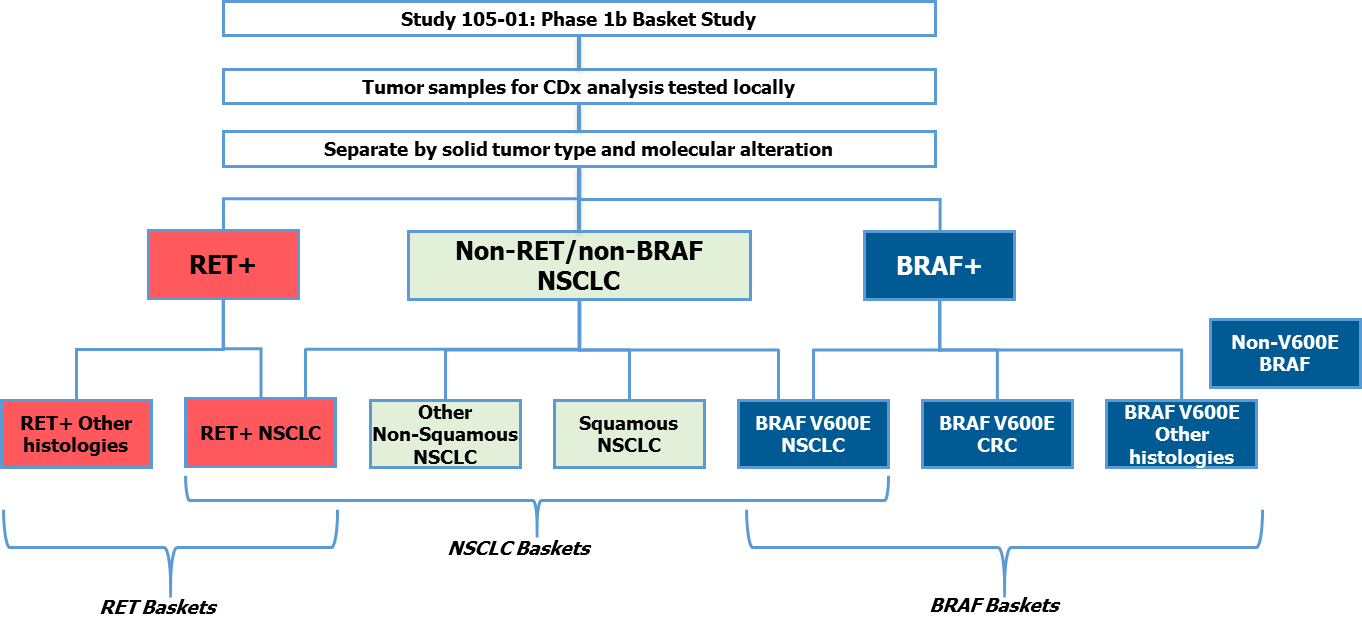


**Figure S4. In vitro activity of RXDX-105.** Ba/F3 cells containing the following constructs were tested: *CCDC6*(exon 1)-*RET*(exon12), *NCOA4*(exon6)-*RET*(exon12), and *KIF5B*(exon15)-*RET*(exon12). In addition to RXDX-105, four other RET inhibitors (cabozantinib, vandetanib, sitravatinib, and alectinib), a MEK inhibitor (trametinib), and a pan-PI3K/mTOR inhibitor (omipalisib) were tested. At least a ~2-fold increase in IC50 was noted for RXDX-105 and a shift was likewise noted with other multikinase inhibitors. Trametinib was active against KIF5B-RET but not CCDC6-RET and NCOA4-RET, and omipalisib was active against all three fusions, but with the highest activity in KIF5B-RET. These imply signaling differences between various RET fusions potentially dictated by upstream partner type.

**Table S1. Patient disposition.** The disposition of all 152 patients treated with RXDX-105 on this trial are detailed.

|  | RP2D (275 mg fed), n=74 | Other doses, n=78 | All subjects, n=152 (n=182 screened) |
| --- | --- | --- | --- |
| Enrolled and treated, n | 74 | 78 | 152 |
| Ongoing, n (%) | 8 (11) | 4 (5) | 12 (8) |
| Discontinued treatment  Radiologic progression  Clinical progression  Adverse event  Withdrawal by subject  Death  Other (PI discretion) | 66 (89)  31 (42)  15 (20  9 (12)  4 (5)  5 (7)  5 (7) | 74 (95)  34 (44)  16 (21)  14 (18)  7 (9)  -  - | 140 (92)  65 (43)  31 (20)  23 (15)  11 (7)  5 (3)  5(3) |

**Table S2. Patients treated in dose escalation.** A total of 55 patients were treated in 9 cohorts on the phase 1 dose escalation phase of this trial.

| Cohort | Dose (mg) | # of Pts |
| --- | --- | --- |
| 1 | 20 | 4 |
| 2 | 40 | 3 |
| 3 | 75 | 3 |
| 4 | 100 | 3 |
| 5 | 150 | 4 |
| 6 | 200 | 8 |
| 7 | 275 | 10 |
| 7 (fed) | 275 | 12 |
| 8 (fed) | 350 | 8 |

**Table S3. Prior tyrosine kinase inhibitor therapy in patients with *RET* fusion-positive lung cancers.** The multikinase RET inhibitors that patients received prior to RXDX-105 (either as a single agent or in combination with an mTOR inhibitor) are listed.

| Patient | Multikinase Inhibitor Administered Prior to RXDX-105 |
| --- | --- |
| Case 1 | Cabozantinib  Vandetanib/Everolimus |
| Case 2 | Vandetanib/Everolimus |
| Case 3 | Cabozantinib |
| Case 4 | Cabozantinib |
| Case 5 | Cabozantinib |
| Case 6 | Cabozantinib  Alectinib |
| Case 7 | Vandetanib/Everolimus |
| Case 8 | Vandetanib |
| Case 9 | Vandetanib |
